# Supplementary material for: How does evolution design functional free energy landscapes of proteins? A case study on the emergence of regulation in the Cyclin Dependent Kinase family
Source: Royal Society of Chemistry journal article supplement (doi:10.1039/c9me00097f), 2019-12-20
Supplement: c9me00097f1.pdf [file c9me00097f1.pdf]

# Supporting information: How evolution designs functional free energy landscapes of proteins? A case study on emergence of regulation in CDK family kinases.

Zahra Shamsi<sup>†</sup> and Diwakar Shukla<sup>\*,†,‡,¶,§,||,⊥</sup>

<sup>†</sup>*Department of Chemical and Biomolecular Engineering, University of Illinois at Urbana-Champaign, Urbana, IL 61801, USA*

<sup>‡</sup>*Department of Plant Biology, University of Illinois at Urbana-Champaign, Urbana, IL 61801, USA*

<sup>¶</sup>*Center for Biophysics and Quantitative Biology, University of Illinois at Urbana-Champaign, Urbana, IL 61801, USA*

<sup>§</sup>*National Center for Supercomputing Applications, Urbana, IL 61801, USA*

<sup>||</sup>*NIH Center for Macromolecular Modeling and Bioinformatics, University of Illinois at Urbana-Champaign, Urbana, IL 61801, USA*

<sup>⊥</sup>*Beckman Institute for Advanced Science and Technology, University of Illinois at Urbana-Champaign, Urbana, IL 61801, USA*

E-mail: diwakar@illinois.edu

## List of Figures

|     |                                                                                                                                           |    |
|-----|-------------------------------------------------------------------------------------------------------------------------------------------|----|
| S1  | Phylogenetic tree. . . . .                                                                                                                | 5  |
| S2  | Amino acid sequence alignment of CDK2 and CMGI. . . . .                                                                                   | 6  |
| S3  | Scatter plot of R150-E51 versus K33-E51 distances calculated using<br>all available crystal structures of CDK2 kinase. . . . .            | 7  |
| S4  | Scatter plot of R-spine RMSD versus K33-E51 distances calculated<br>using all available crystal structures of CDK2 kinase. . . . .        | 8  |
| S5  | Scatter plot of helical turn RMSD versus K33-E51 distances calcu-<br>lated using all available crystal structures of CDK2 kinase. . . . . | 9  |
| S6  | Scatter plot of catalytic base versus K33-E51 distances calculated<br>using all available crystal structures of CDK2 kinase. . . . .      | 10 |
| S7  | Scatter plot of E12-H161 versus K33-E51 distances calculated using<br>all available crystal structures of CDK2 kinase. . . . .            | 11 |
| S8  | Free energy landscape of K-E and E-H distances based on equilib-<br>rium weighted simulation data. . . . .                                | 12 |
| S9  | Crystal structures of kinases bound to ATP and ions . . . . .                                                                             | 13 |
| S10 | Probability density map of K33-E51 and D145-ATP distances based<br>on raw simulation data in CDK2 bound to cyclin. . . . .                | 14 |
| S11 | Probability density map of four switches based on equilibrium weighted<br>simulation data in CDK2. . . . .                                | 15 |
| S12 | Probability density map of four switches based on equilibrium weighted<br>simulation data in CMGI . . . . .                               | 16 |
| S13 | Free energy landscape of CDK2 and CMGI based on equilibrium<br>weighted simulation data. . . . .                                          | 17 |
| S14 | Cont. free energy landscape of CDK2 and CMGI based on equilib-<br>rium weighted simulation data. . . . .                                  | 18 |

|     |                                                                                                                                                                                                    |    |
|-----|----------------------------------------------------------------------------------------------------------------------------------------------------------------------------------------------------|----|
| S15 | Cont. free energy landscape of CDK2 and CMGI based on equilibrium weighted simulation data. . . . .                                                                                                | 19 |
| S16 | Cont. free energy landscape of CDK2 and CMGI based on equilibrium weighted simulation data. . . . .                                                                                                | 20 |
| S17 | Shortest path connecting closest state to inactive crystal structure (PDB ID: 3PXR) to closest state to active crystal structure (PDB ID: 1FIN) in CDK2's MSM. . . . .                             | 21 |
| S18 | Shortest path connecting closest state to inactive crystal structure (PDB ID: 3PXR <sup>5</sup> ) to closest state to active crystal structure (PDB ID: 1FIN <sup>4</sup> ) in CMGI's MSM. . . . . | 22 |
| S19 | Root mean square fluctuations (RMSF) of residues in CDK2. . . .                                                                                                                                    | 23 |
| S20 | Root mean square fluctuations (RMSF) of residues in CMGI. . . .                                                                                                                                    | 24 |
| S21 | GMRQ score for MSM as a function of number of clusters and tICA components. . . . .                                                                                                                | 25 |
| S22 | Population of simulation data used in MSM as a function of number of clusters and tICA components. . . . .                                                                                         | 26 |
| S23 | CDK2's eigenvalues of the transition probability matrix. . . . .                                                                                                                                   | 27 |
| S24 | CMGI's eigenvalues of the transition probability matrix. . . . .                                                                                                                                   | 28 |

## Accelerated molecular dynamics simulations.

Accelerated molecular dynamics is a biasing potential method, derived to lower the local barriers between different states and make calculations much faster. Amber 14 implementation of aMD was used for boosting torsional terms independently.<sup>1</sup> The modified potentials are defined as following:

$$V^*(r) = V(r) + \Delta V(r)$$

$$\Delta V(r) = \frac{(E_p - V(r))^2}{(\alpha_p + E_p - V(r))} + \frac{(E_d - V_d(r))^2}{(\alpha_D + E_d - V_d(r))}$$

where  $V(r)$ ,  $V_d(r)$ ,  $E_p$  and  $E_d$  are the normal potential, normal torsion potential, average potential and dihedral energies. Parameters of  $\alpha_P$  and  $\alpha_D$  are factors inversely control the strength with which the boost is applied.<sup>1</sup> Using a trial short unbiased MD simulation of different systems, energy terms and other parameters were calculated as shown in Table S1 and S2.

Table S1: Accelerated MD parameters for starting structures in CDK2.

| System structure (PDB ID) | $\alpha_D$ | $E_d$   | $\alpha_P$ | $E_p$      |
|---------------------------|------------|---------|------------|------------|
| 1FIN                      | 223.13     | 4834.55 | 8317.40    | -124339.53 |
| 3PXR                      | 222.08     | 4811.80 | 8400.20    | -125495.11 |
| 3PXF                      | 221.37     | 4796.44 | 8359.80    | -125030.85 |
| 4GCJ                      | 226.55     | 4908.60 | 8723.20    | -130328.57 |

Table S2: Accelerated MD parameters for starting structures in CMGL. .

| System structure (model template PDB ID) | $\alpha_D$ | $E_d$   | $\alpha_P$ | $E_p$      |
|------------------------------------------|------------|---------|------------|------------|
| 1FIN                                     | 222.19     | 4814.19 | 9478.20    | -141969.11 |
| 3PXR                                     | 223.79     | 4848.71 | 9902.40    | -148231.35 |
| 3PXF                                     | 222.37     | 4818.08 | 9591.60    | -143668.54 |
| 4GCJ                                     | 223.00     | 4831.64 | 8927.20    | -141717.94 |



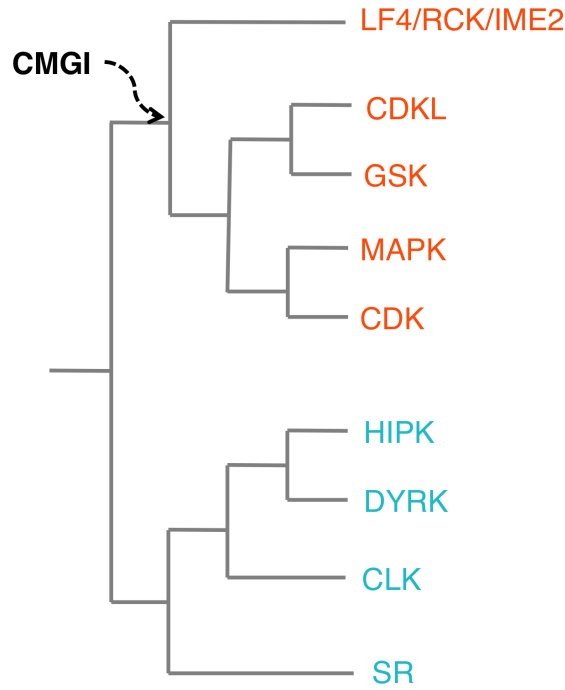

Figure S1: **Phylogenetic tree.** Cyclin Dependent Kinase (CDK), Mitogen Activated Protein Kinase (MAPK), Glycogen Synthase Kinase (GSK), and Casein Kinase (CK) group of kinases. The CMGC group also contains the CDK-Like kinases (CDKL), SR-kinases, Homeodomain-Interacting Kinases (HIPKs), CDC-Like Kinases (CLKs), Dual-Specificity Tyrosine Regulated Kinases (DYRKs), and a paralogous superfamily of kinases including LF4, the mammalian RCK kinases (ICK, MOK, and MAK), and the fungal IME2 kinases.

CDK2 1 M E N F Q K V E K I G E G T Y G V V Y K A R N K L T G E V V A D K K I R L D T E T E G V P S T A I R E I S L L K E L N  
CMGI 1 . . R Y E V L R K I G E G T F G T V W K A R D K E T G E I V A D K K I K N K F E N S N . A Q T A L R E I K L L K K L K

CDK2 60 H P N I V K L L D V I H T E . . N K L Y L V F E F L H Q D L K K F M D A S A L T G I P L P L I K S Y L F Q L L Q G L A  
CMGI 57 H P N I V K L L D V F R S P K N K H L Y L V F E Y M E M N L Y E L I K N H . K K P L P E D Q V K S F M Y Q I L R G L E

CDK2 117 F C H S H R V L H R D L K P Q N L L I N T E G A I K L A D F G L A R A F G V P V R T Y T H E V V T L W Y R A P E I L L  
CMGI 115 Y I H R H G I I H R D L K P E N I L I T D G V L K I A D F G L A R A M N S . K Q P Y T E Y V A T R W Y R A P E V L L

CDK2 176 G C K Y Y S T A V D I W S L G C I F A E M V T R R A L F P G D S E I D Q L F R I F R T L G T P D E V V W P G V T S M P  
CMGI 173 G S S H Y S T A V D M W S V G C I F A E M L T G K P L F P G D S E I D Q L H K I M E V L G T P S E E D W P G S K L P

CDK2 235 D Y K P . S F P K W A R Q D F S K V V P P L D E D G R S L L S Q M L H Y D P N K R I S A K A A L A H P F F Q D V T  
CMGI 232 D Y M G F R F P K R P P K P L E E L F P N V S P E A L D L L K K M L T Y D P D K R I T A E E A L K H P Y F K E L R

Figure S2: **Amino acid sequence alignment of CDK2 and CMGI.** The red box with white character shows strict identity and blue frame with red character means similarity across groups between the sequences. ESPrnt 3 web server is used to generate the alignment.<sup>2</sup>

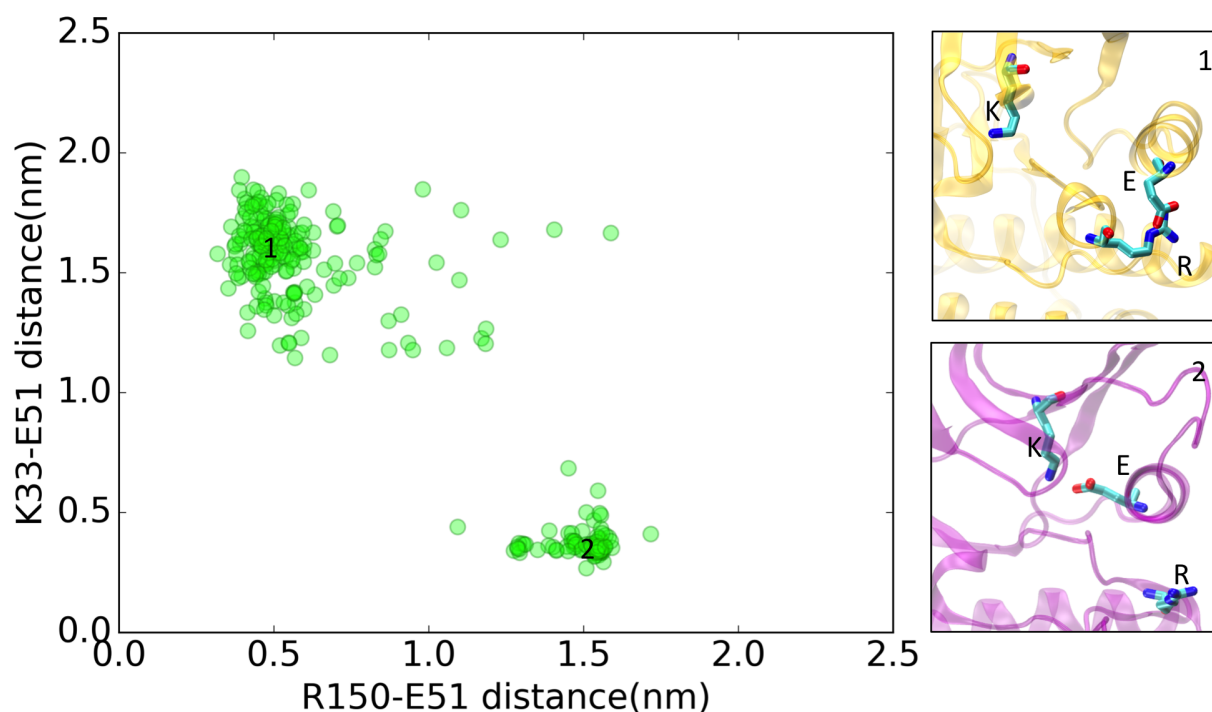

Figure S3: **Scatter plot of R150-E51 versus K33-E51 distances calculated using all available crystal structures of CDK2 kinase.** The scatter plot separates structures into two regions of active and inactive. Region 1 highlights inactive crystal structures with broken K-E bond, and mostly formed R-E bond. A crystal structure representative of region 1 (PBD ID: 2VTP<sup>3</sup>) is shown in **box 1**. Region 2 highlights active crystal structures with formed K-E and broken R-E bond. In **box 2** a crystal structure (PBD ID: 1FIN<sup>4</sup>) representative of region 2 is shown.

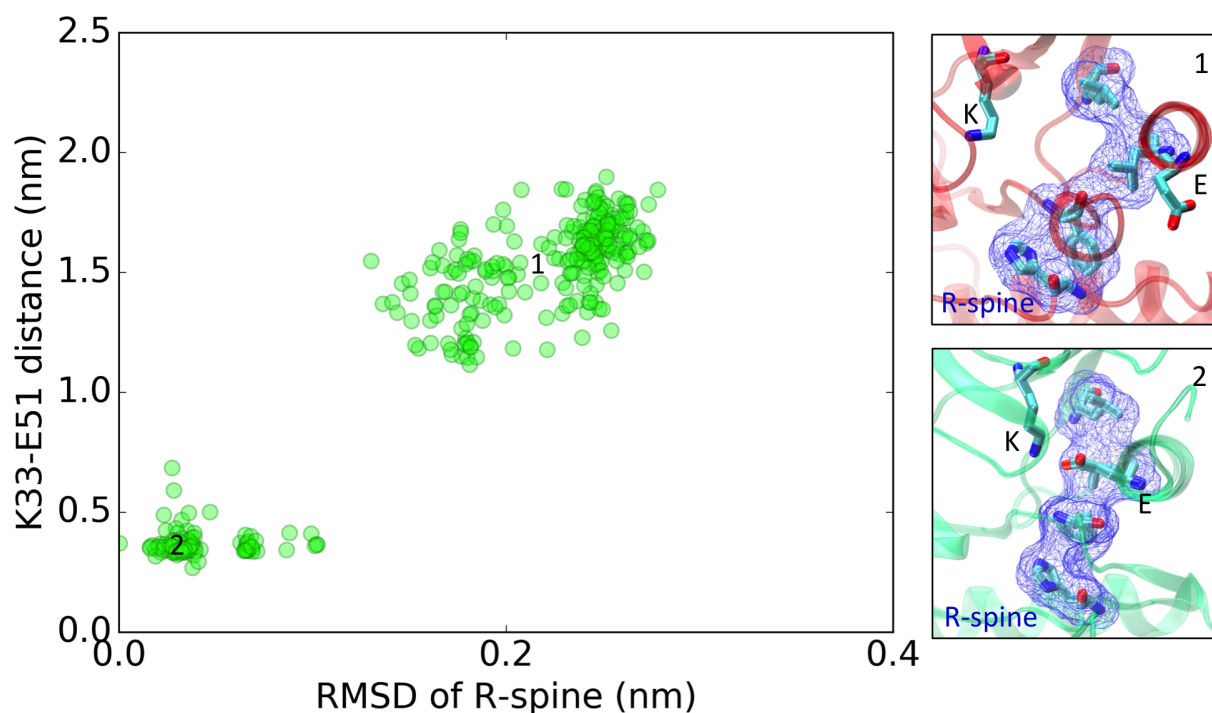

Figure S4: **Scatter plot of R-spine RMSD versus K33-E51 distances calculated using all available crystal structures of CDK2 kinase.** Scatter plot of R-spine RMSD versus K33-E51 distances calculated using all available crystal structures of CDK2 kinase. The scatter plot of the R-spine residues (Leu66, Leu55, Phe146, and His125) RMSD and K33-E51 distance shows two distinct regions. A crystal structure representative for region 1 (PBD ID: 2VTP) with broken R-spine and K-E bond is shown in **box 1**. Region 2 highlights crystal structures with formed R-spine and K-E bond. A crystal structure representative for region 2 (PBD ID: 1FIN) is shown in **box 2**. All R-spine RMSDs were calculated with respect to active crystal structure (PDB ID: 1FIN).

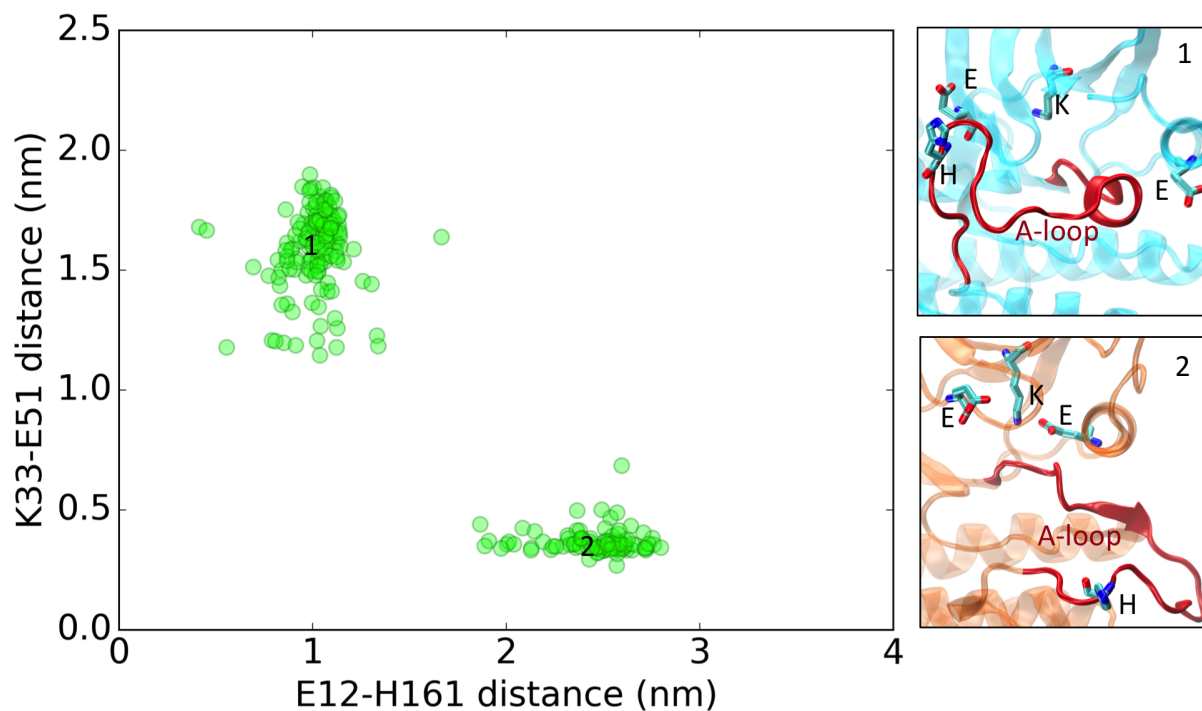

Figure S5: **Scatter plot of helical turn RMSD versus K33-E51 distances calculated using all available crystal structures of CDK2 kinase.** The scatter plot of the helical turn in A-loop residues (Gly147, Leu148, Ala149, Arg150, Ala151, Phe152) RMSD and K33-E51 distance separates the crystal structures into two regions of active and inactive. A crystal structure representative for region 1 (PDB ID: 3PXR<sup>5</sup>) with broken R-spine and K-E bond is shown in **box 1**. Region 2 highlights crystal structures with formed R-spine and K-E bond. A crystal structure representative for region 2 (PDB ID: 1FIN) is shown in **box 2**. Helical turn RMSDs were calculated with respect to inactive crystal structure (PDB ID: 3PXR<sup>5</sup>).

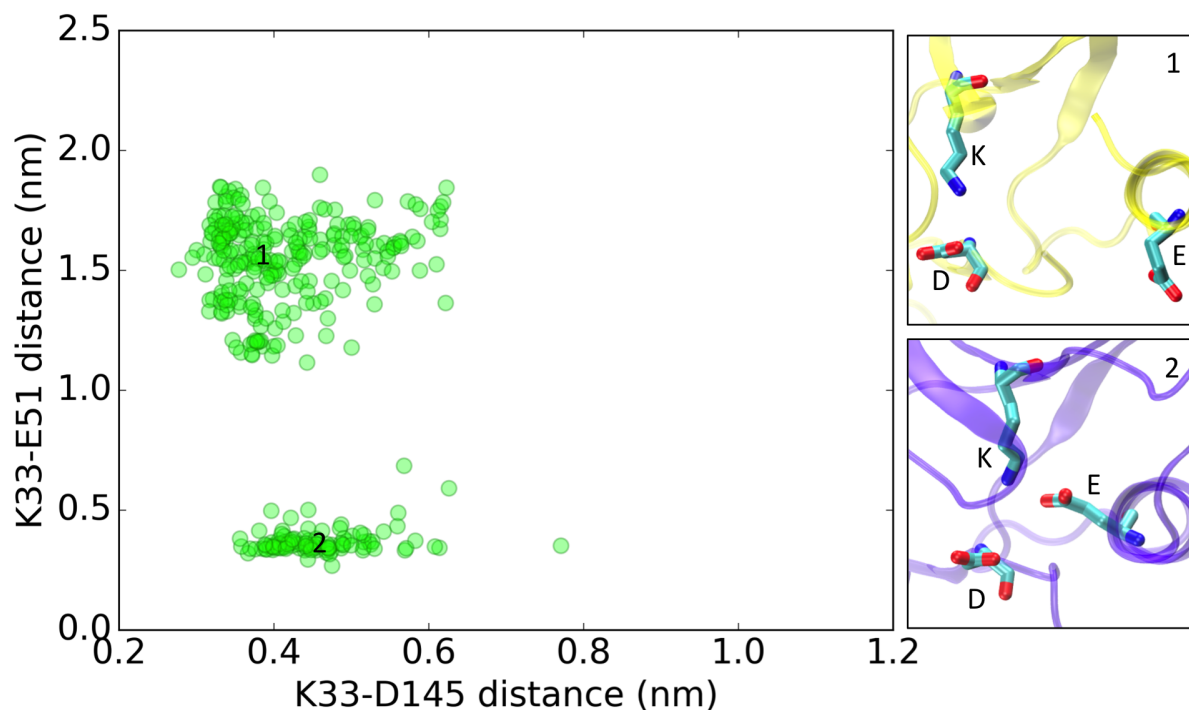

Figure S6: **Scatter plot of catalytic base versus K33-E51 distances calculated using all available crystal structures of CDK2 kinase.** Projection of available crystal structures of CDK2 in K33-E51 versus K33-D145 distances classifies the structures into two regions. Region 1 with broken K33-E51 bond and formed K33-D145 bond is depicted in the **box 1** (PBD ID: 1AQ1<sup>4</sup>). In **box 2** a crystal structure (PBD ID: 1FIN<sup>6</sup>) from region 2 is shown with formed K-E bond and broken K-D bond.

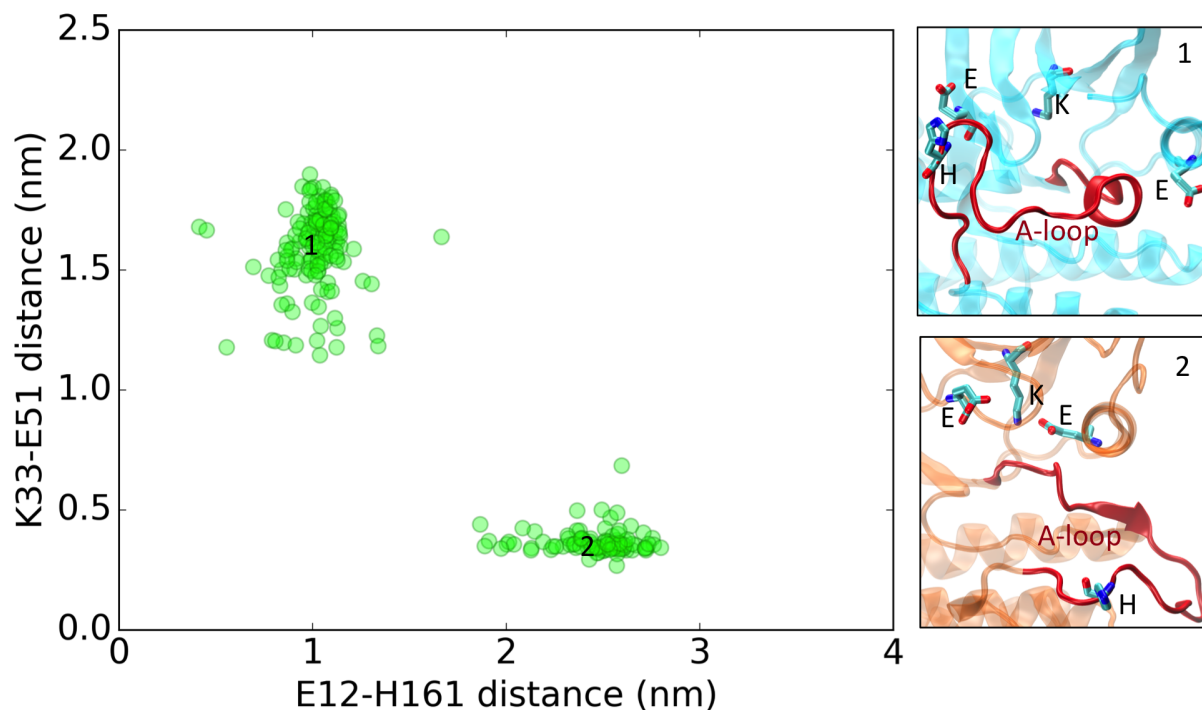

Figure S7: **Scatter plot of E12-H161 versus K33-E51 distances calculated using all available crystal structures of CDK2 kinase.** The distance between E12 in p-loop and H161 in A-loop can capture the distance between two loops and classifies the crystal structures into two distinct regions. Region 1 highlights crystal structures with broken K-E and formed E-H, which is shown in **box 1** (PBD ID: 3PXR<sup>5</sup>). Region 2 highlights crystal structures with formed K-E and broken E-H bond. A crystal structure representative for region 2 (PBD ID: 1FIN<sup>4</sup>) is shown in **box 2**.

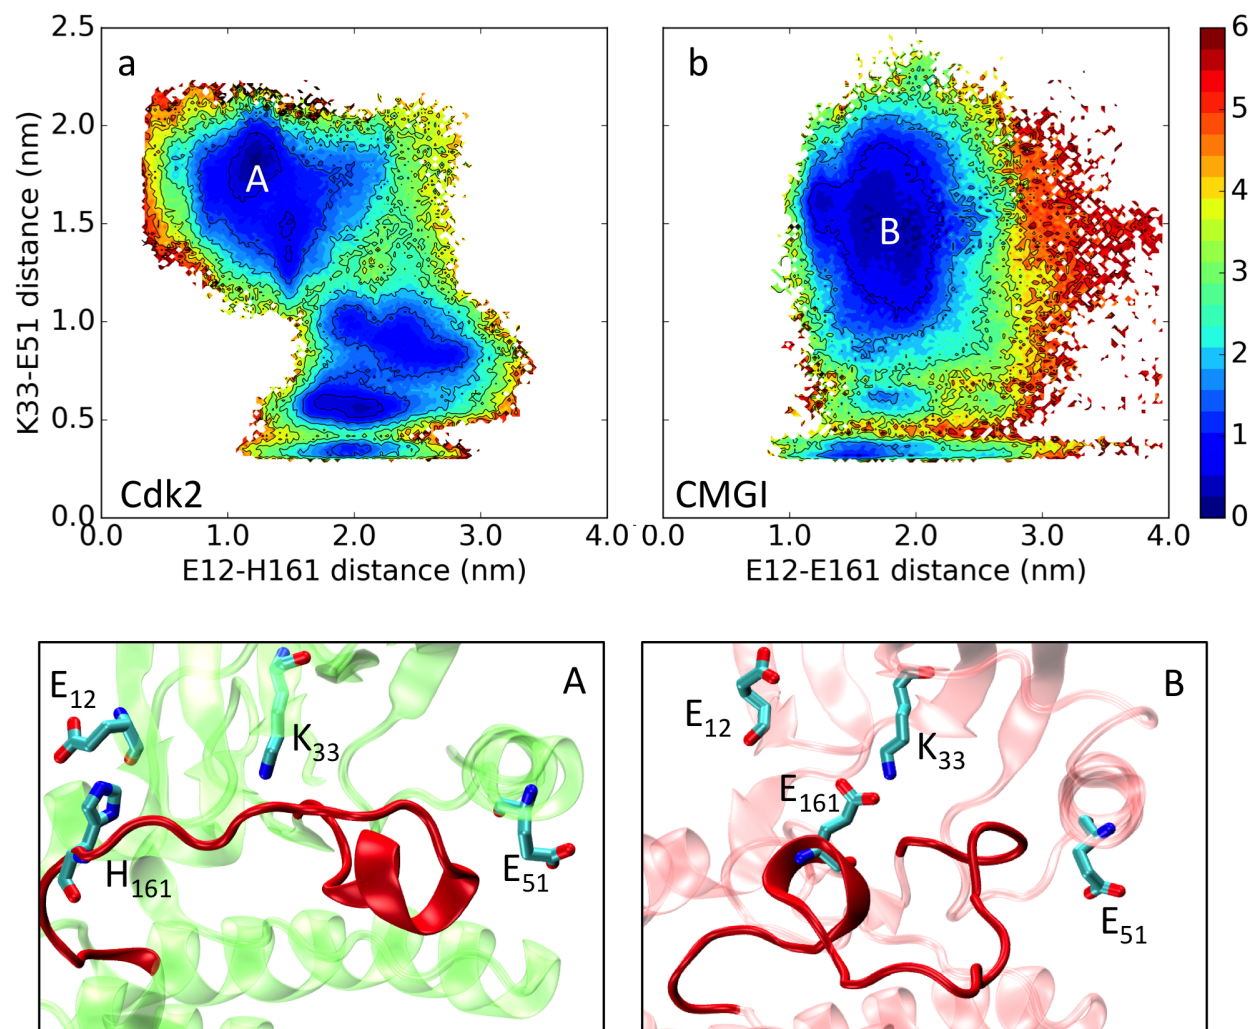

Figure S8: **Free energy landscape of K-E and E-H distances based on equilibrium weighted simulation data.** Comparing two-dimensional conformational landscapes of the K-E versus E-H residue distances shows emergence of a barrier of 3 kcal/mol in CDK2 for breakage of E-H bond. Colors show the free energy in kcal/mol.



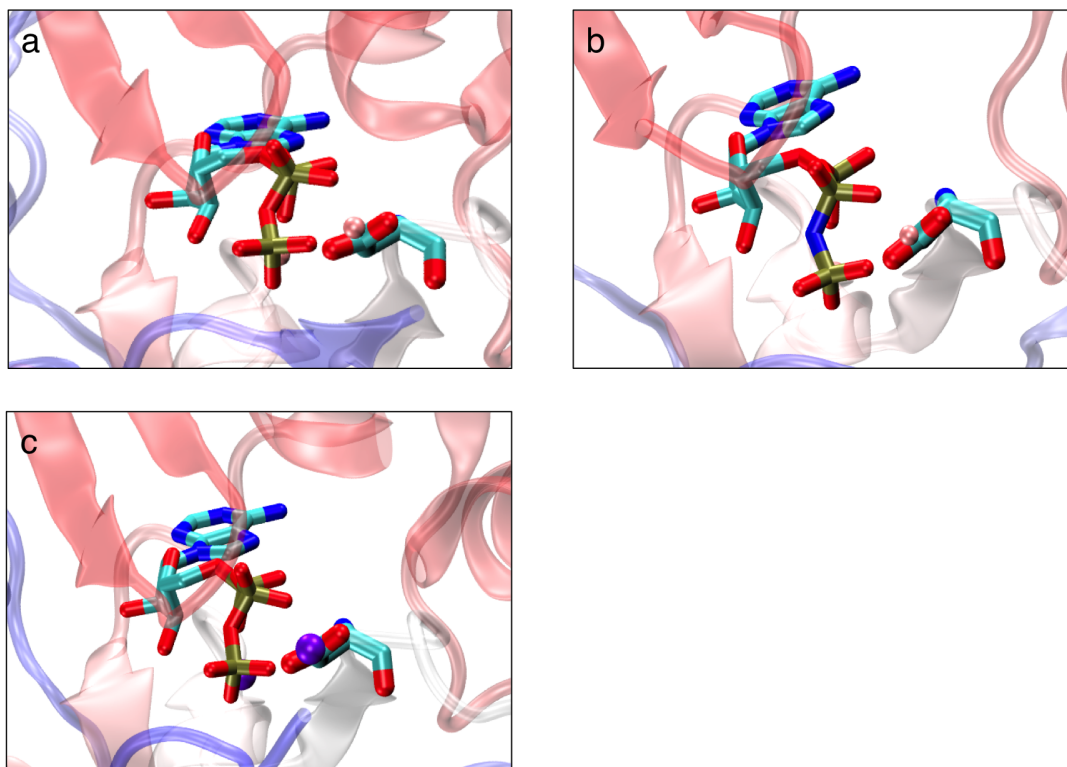

Figure S9: **Crystal structures of kinases bound to ATP and ions.** **a** is 1RDQ, Crystal Structure of a cAMP-dependent Protein Kinase Mutant at 1.26Å: New Insights into the Catalytic Mechanism. , **b**, is 4HPU, Crystal structure of the catalytic subunit of cAMP-dependent protein kinase displaying partial phosphoryl transfer of AMP-PNP onto a substrate peptide . **c** is 1ATP, crystal structure of the catalytic subunit of cAMP-dependent protein kinase complexed with MnATP and a peptide inhibitor.

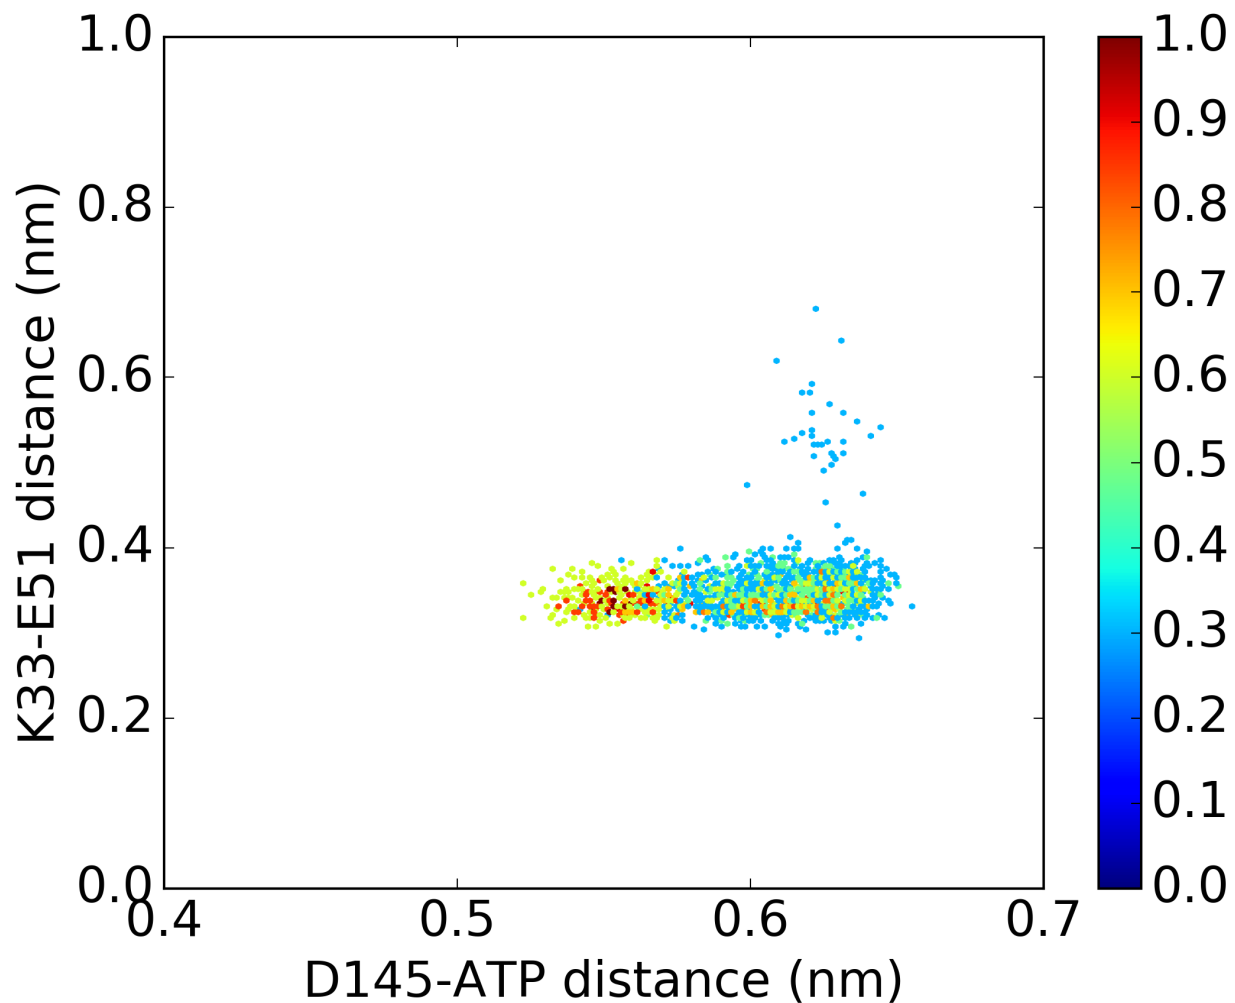

Figure S10: **Probability density map of K33-E51 and D145-ATP distances based on raw simulation data in CDK2 bound to cyclin.** Colors show the logarithm of the frequency in MD simulations.

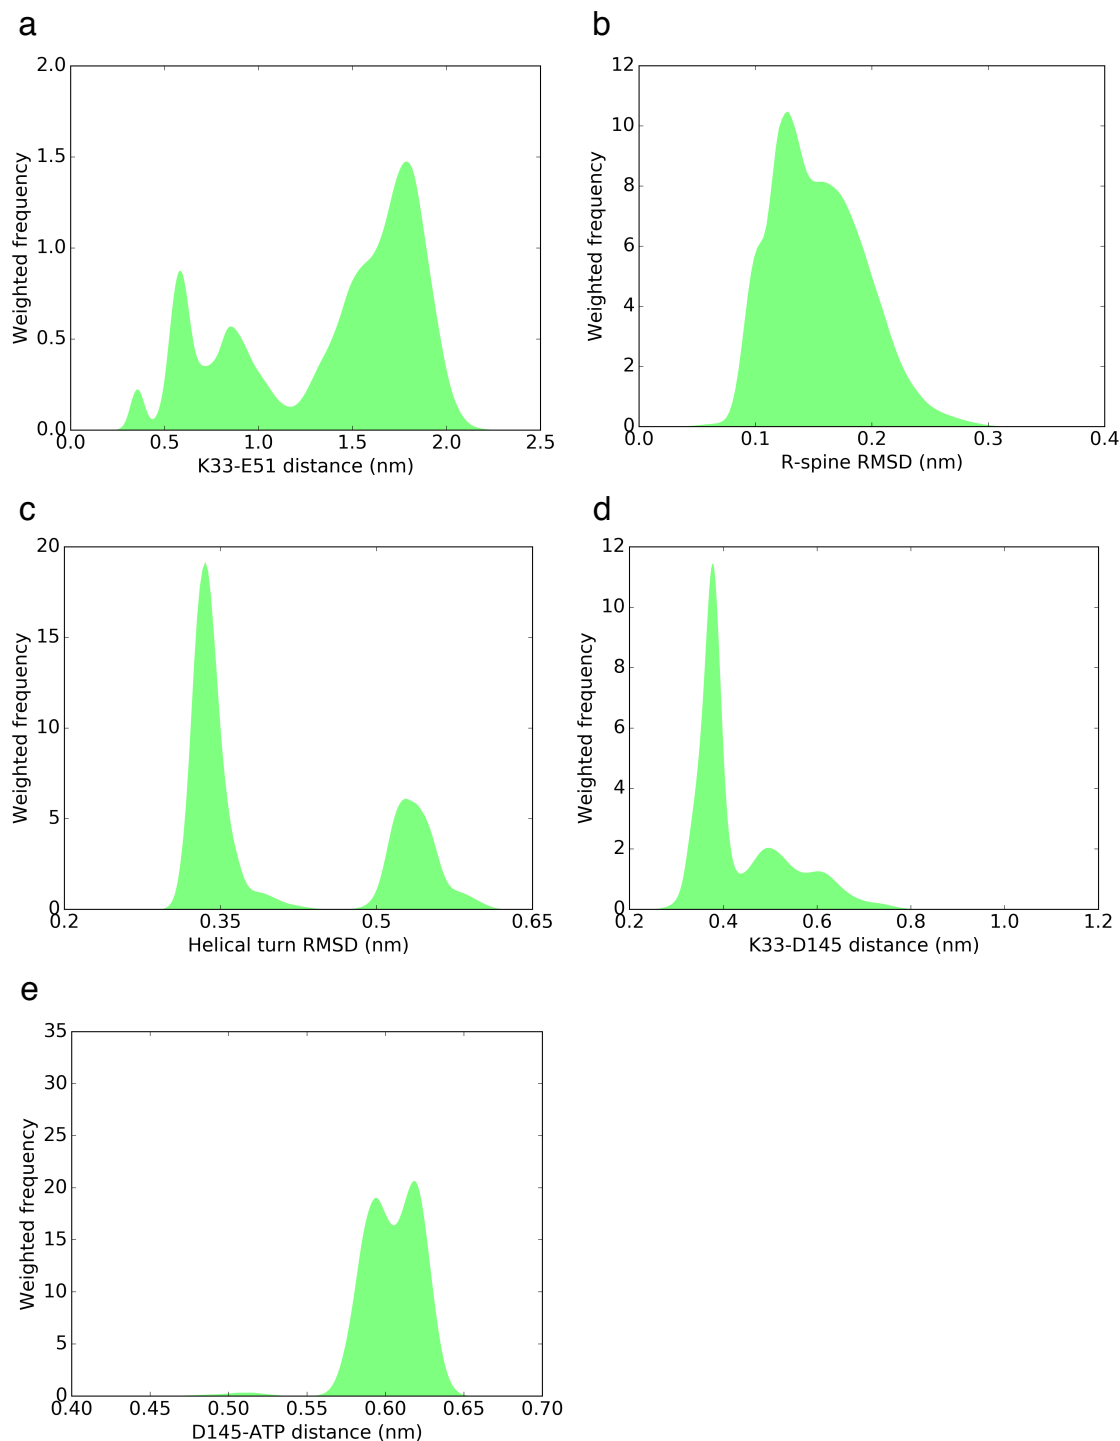

Figure S11: **Probability density map of four switches based on equilibrium weighted simulation data in CDK2.** R-spine RMSDs were calculated with respect to its active crystal structure (PDB ID: 1FIN<sup>4</sup>) and helical turn RMSDs were calculated with respect to inactive crystal structure (PDB ID: 3PXR<sup>5</sup>).

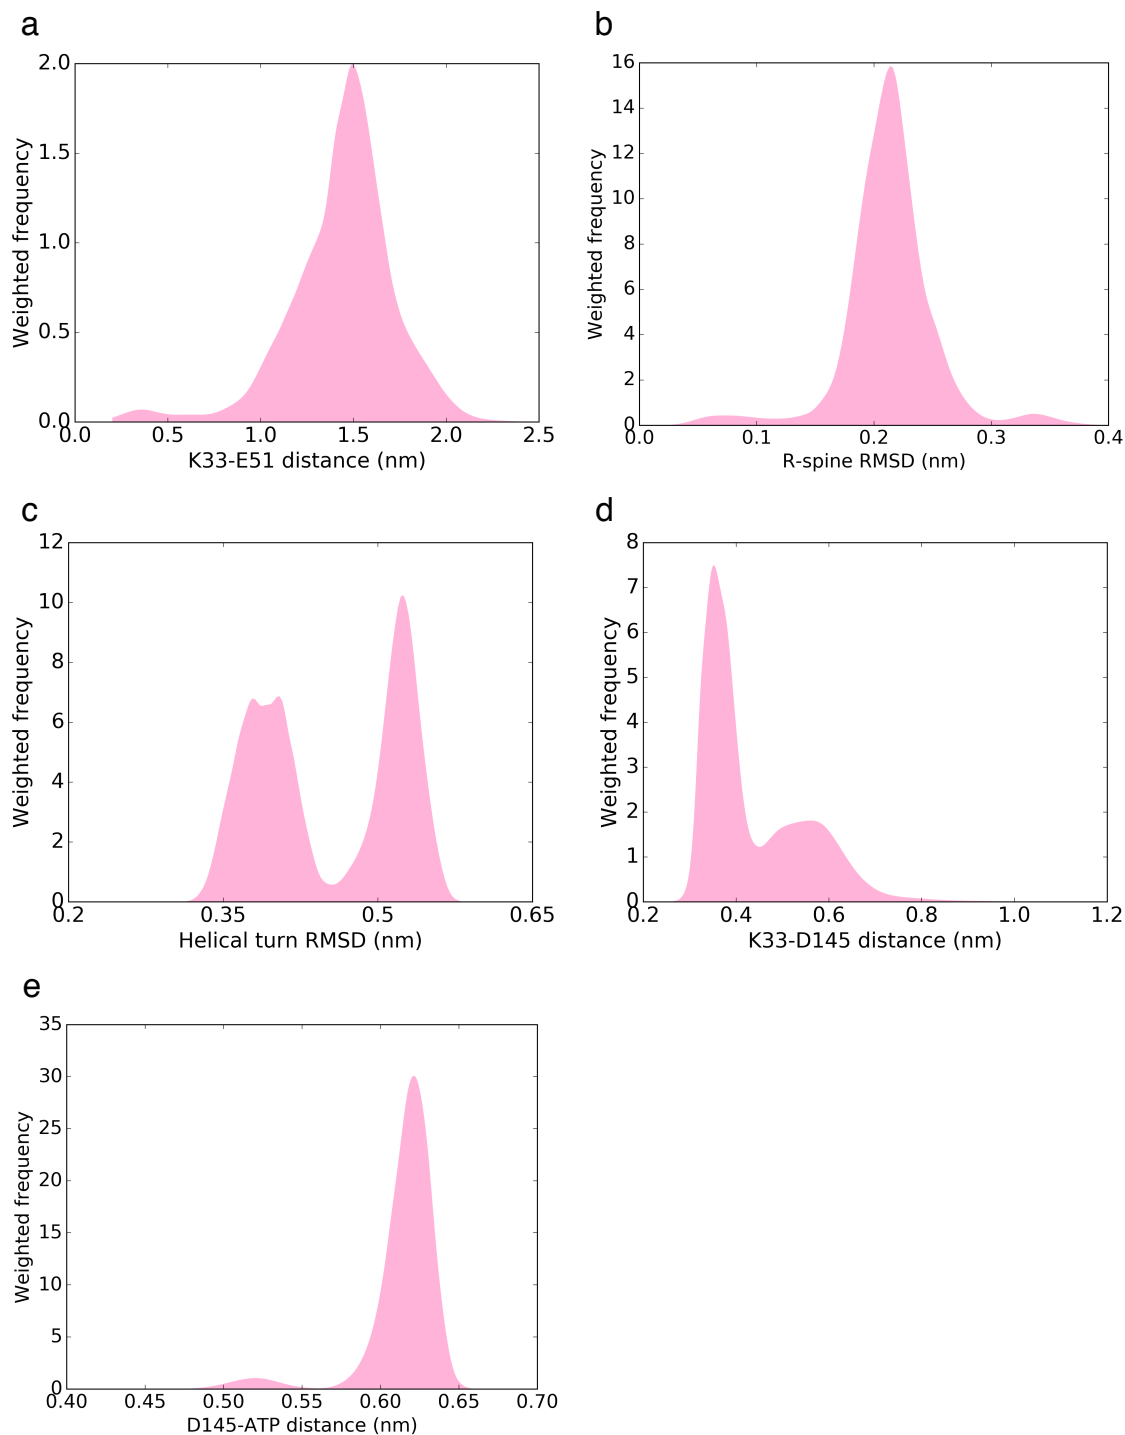

Figure S12: **Probability density map of four switches based on equilibrium weighted simulation data in CMGI.** R-spine RMSDs were calculated with respect to an active structure from simulation and helical turn RMSDs were calculated with respect to inactive crystal structure of CDK2 (PDB ID: 3PXR<sup>5</sup>).

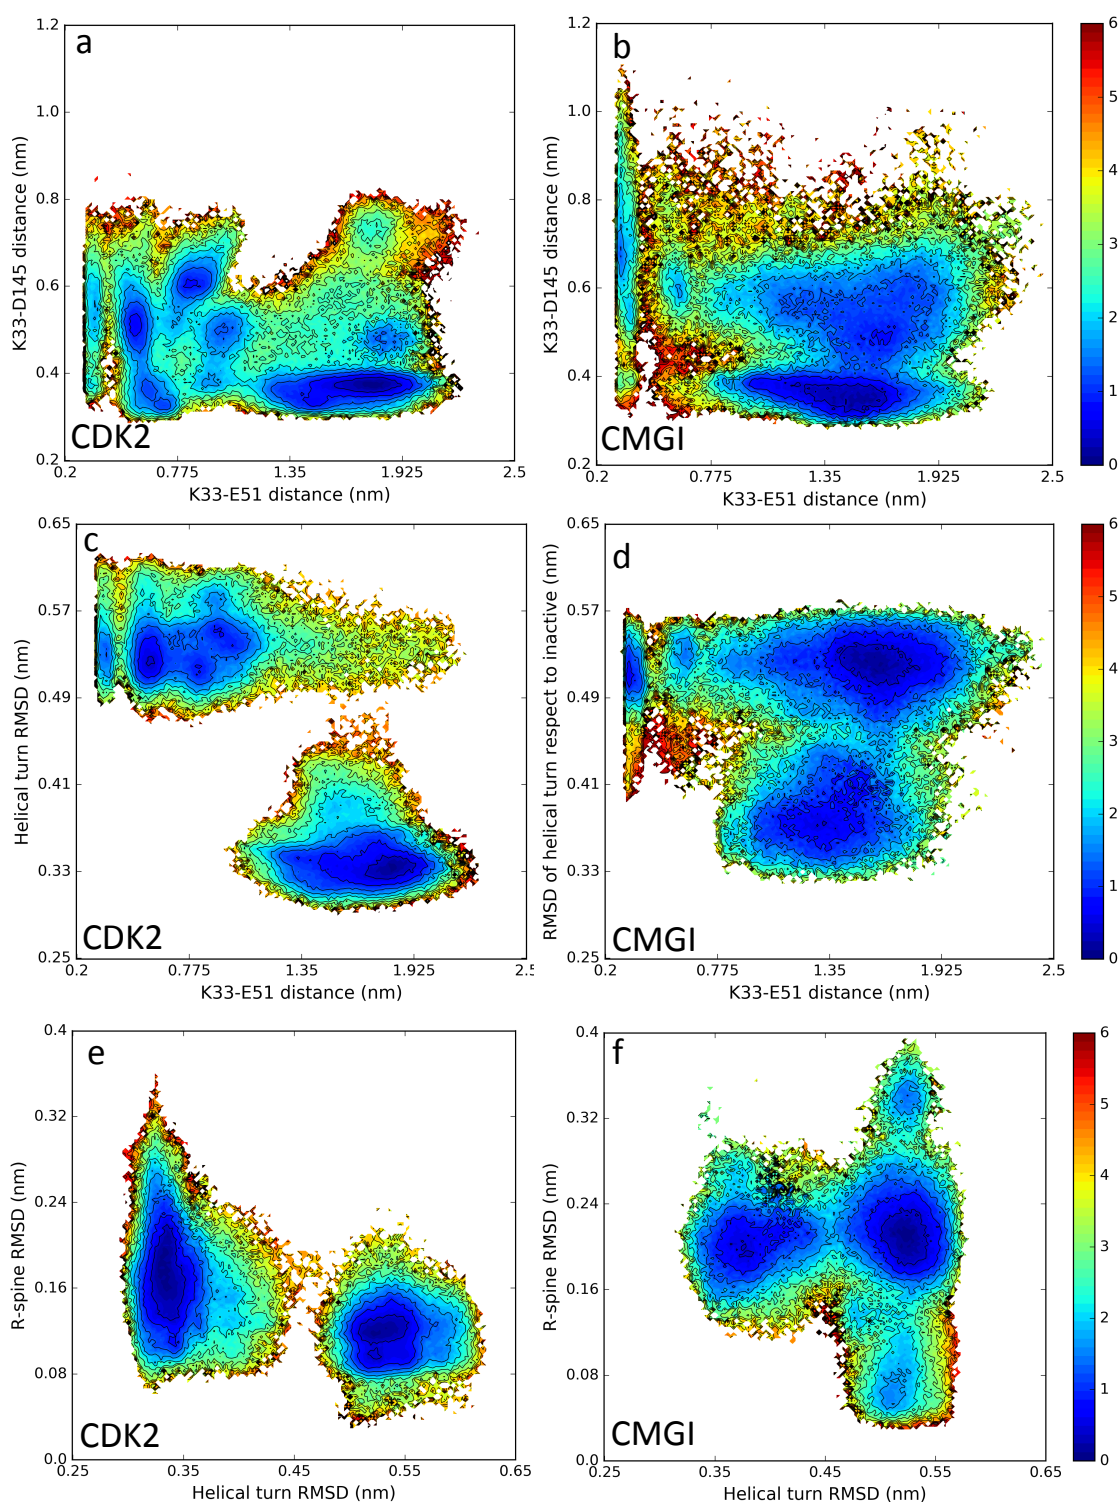

Figure S13: **Free energy landscape of CDK2 and CMGI based on equilibrium weighted simulation data.** R-spine RMSDs were calculated with respect to active crystal structure (PDB ID: 1FIN<sup>4</sup>) in CDK2 and a active structure from simulation in CMGI. Helical turn RMSDs were calculated with respect to inactive crystal structure (PDB ID: 3PXR<sup>5</sup>) in both CDK2 and CMGI. Colors show the free energy in kcal/mol.

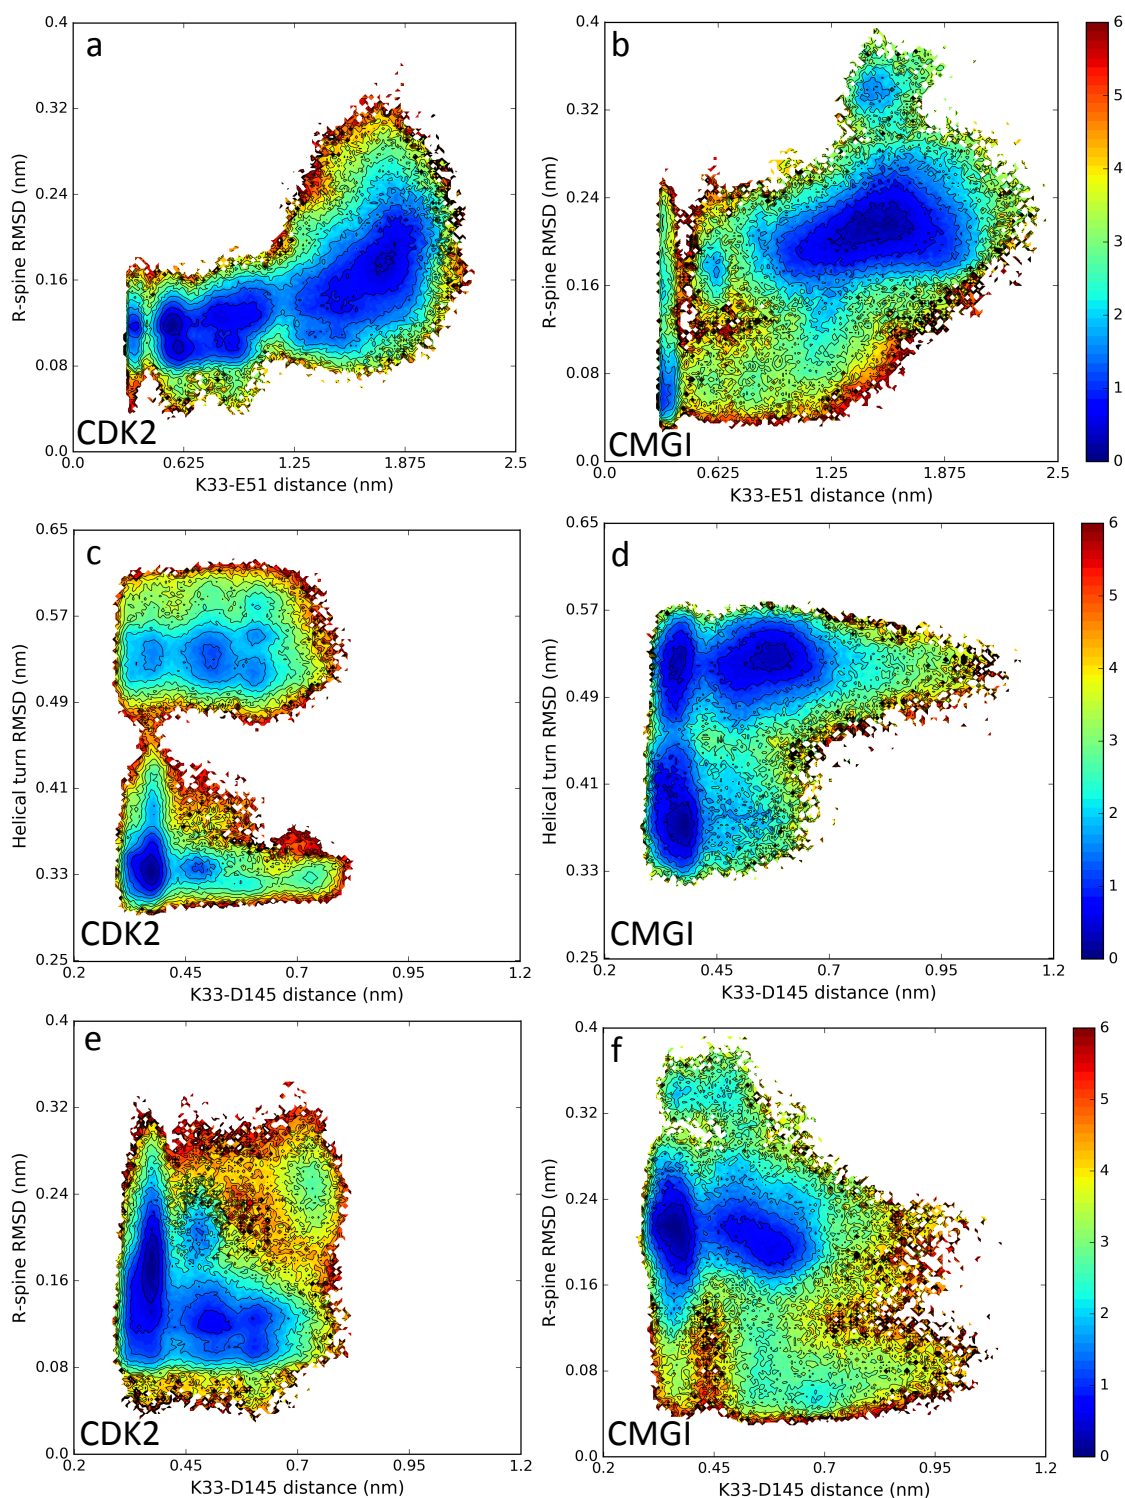

Figure S14: **Cont. free energy landscape of CDK2 and CMGI based on equilibrium weighted simulation data.** R-spine RMSDs were calculated with respect to active crystal structure (PDB ID: 1FIN<sup>4</sup>) in CDK2 and a active structure from simulation in CMGI. Helical turn RMSDs were calculated with respect to inactive crystal structure (PDB ID: 3PXR<sup>5</sup>) in both CDK2 and CMGI. Colors show the free energy in kcal/mol.



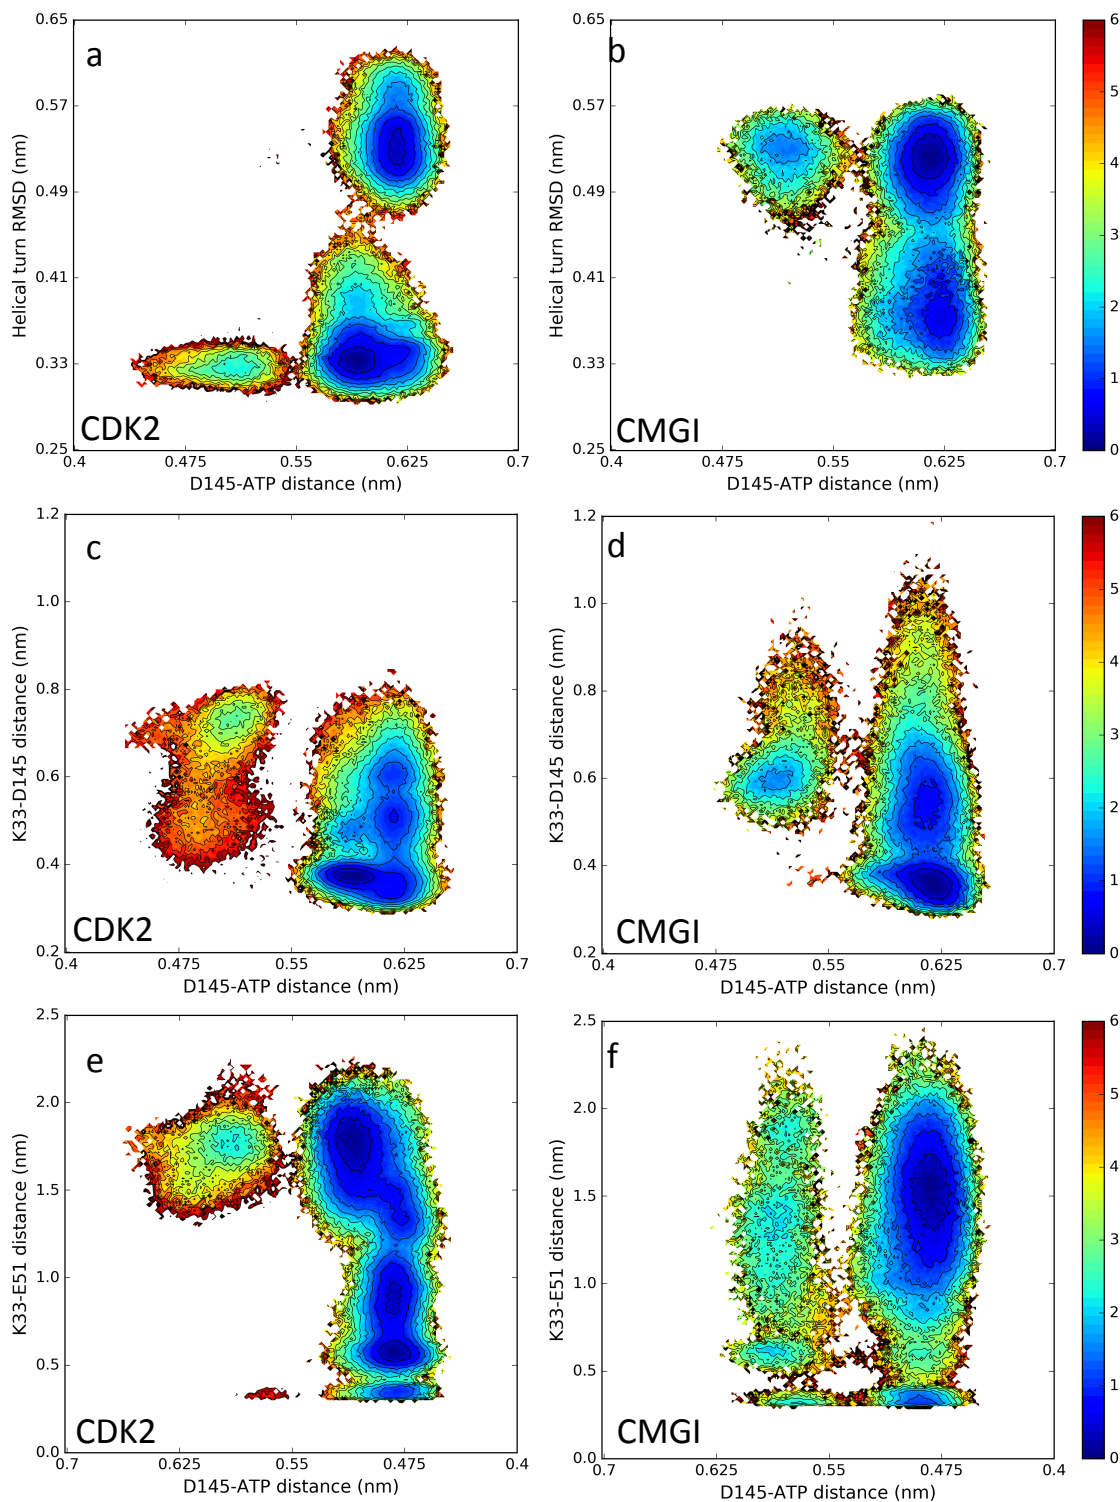

Figure S15: **Cont. free energy landscape of CDK2 and CMGI based on equilibrium weighted simulation data.** R-spine RMSDs were calculated with respect to active crystal structure (PDB ID: 1FIN<sup>4</sup>) in CDK2 and a active structure from simulation in CMGI. Helical turn RMSDs were calculated with respect to inactive crystal structure (PDB ID: 3PXR<sup>5</sup>) in both CDK2 and CMGI. Colors show the free energy in kcal/mol.

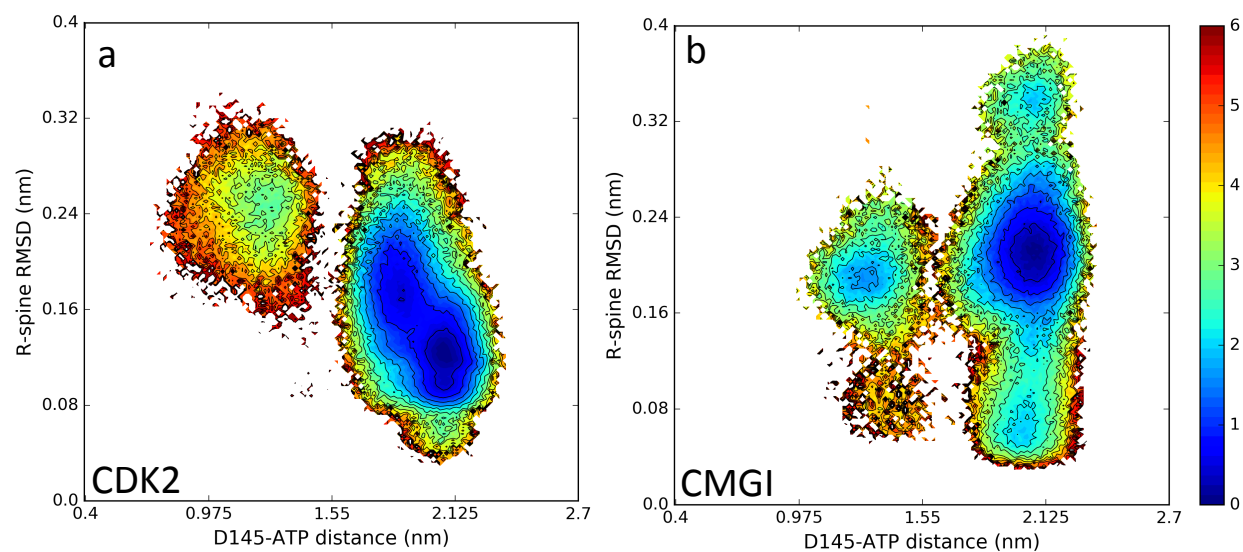

Figure S16: **Cont. free energy landscape of CDK2 and CMGI based on equilibrium weighted simulation data.** R-spine RMSDs were calculated with respect to active crystal structure (PDB ID: 1FIN<sup>4</sup>) in CDK2 and a active structure from simulation in CMGI. Helical turn RMSDs were calculated with respect to inactive crystal structure (PDB ID: 3PXR<sup>5</sup>) in both CDK2 and CMGI. Colors show the free energy in kcal/mol.



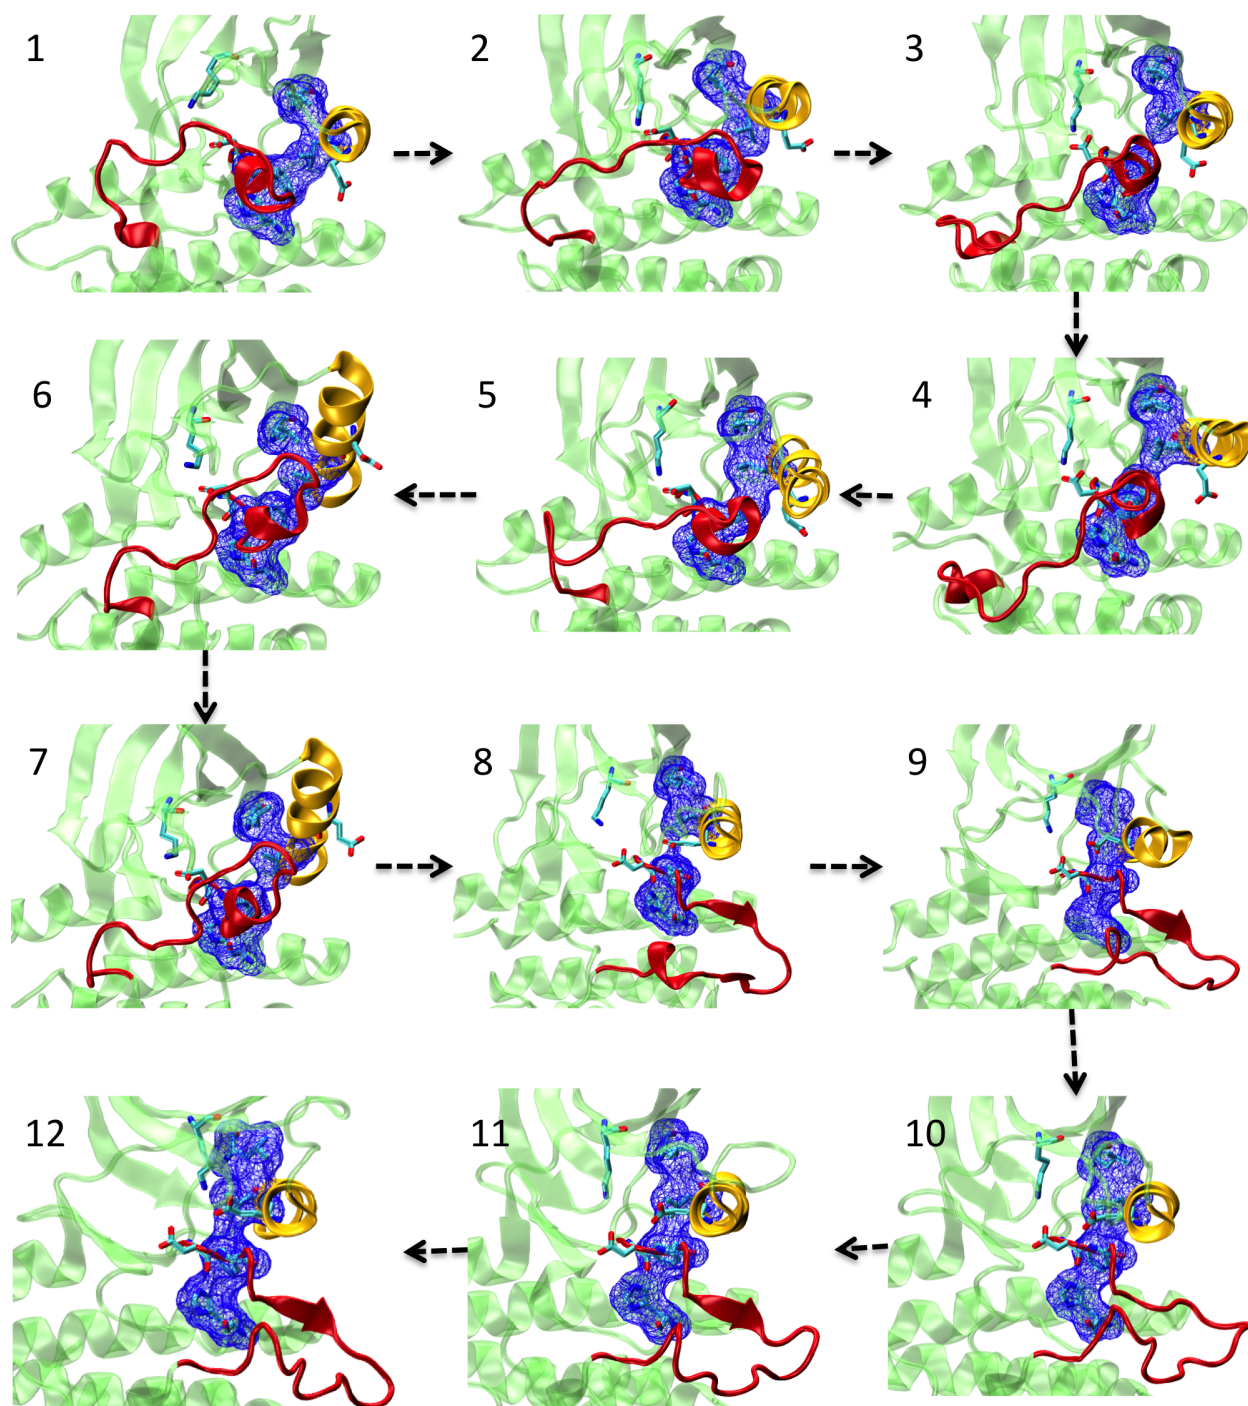

Figure S17: Shortest path connecting closest state to inactive crystal structure (PDB ID: 3PXR<sup>5</sup>) to closest state to active crystal structure (PDB ID: 1FIN<sup>4</sup>) in CDK2's MSM. Using transition path theory (TPT) the shortest activation pathway in CDK2 is captured.

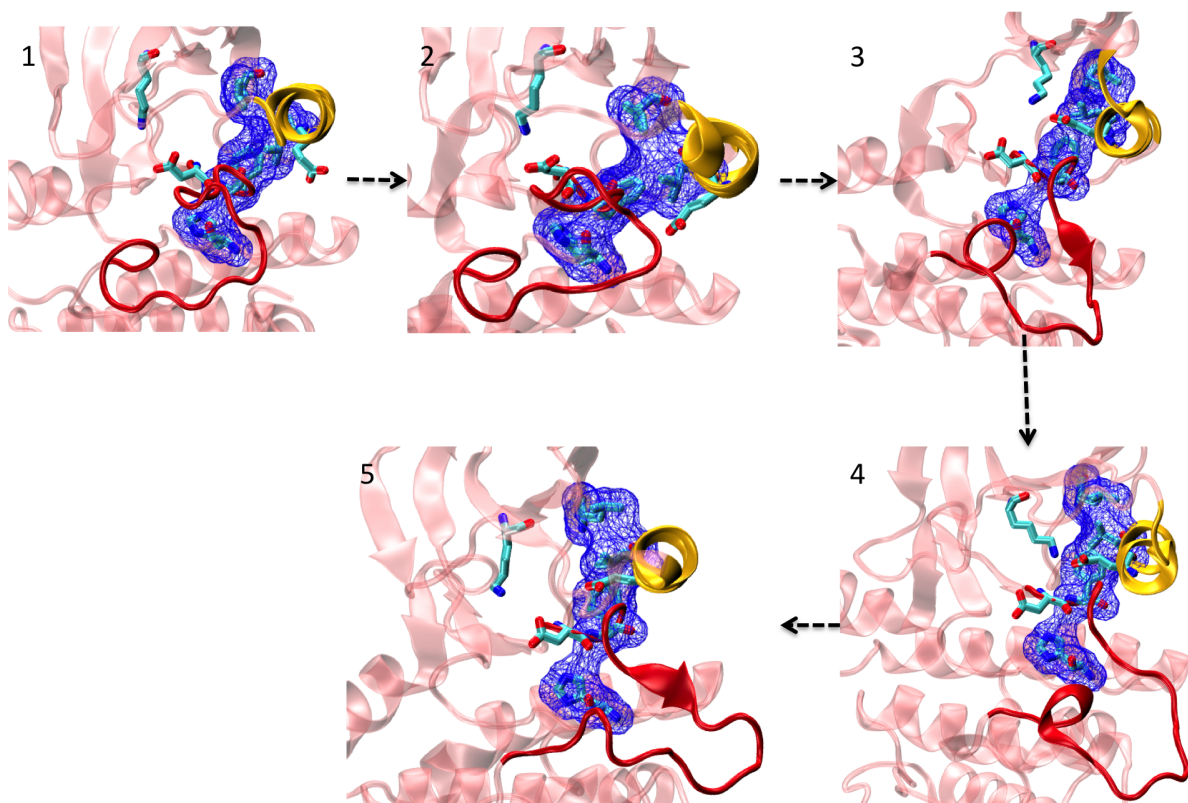

Figure S18: Shortest path connecting closest state to inactive crystal structure (PDB ID: 3PXR<sup>5</sup>) to closest state to active crystal structure (PDB ID: 1FIN<sup>4</sup>) in CMGI's MSM. Using transition path theory (TPT) the shortest activation pathway in CMGI is captured.

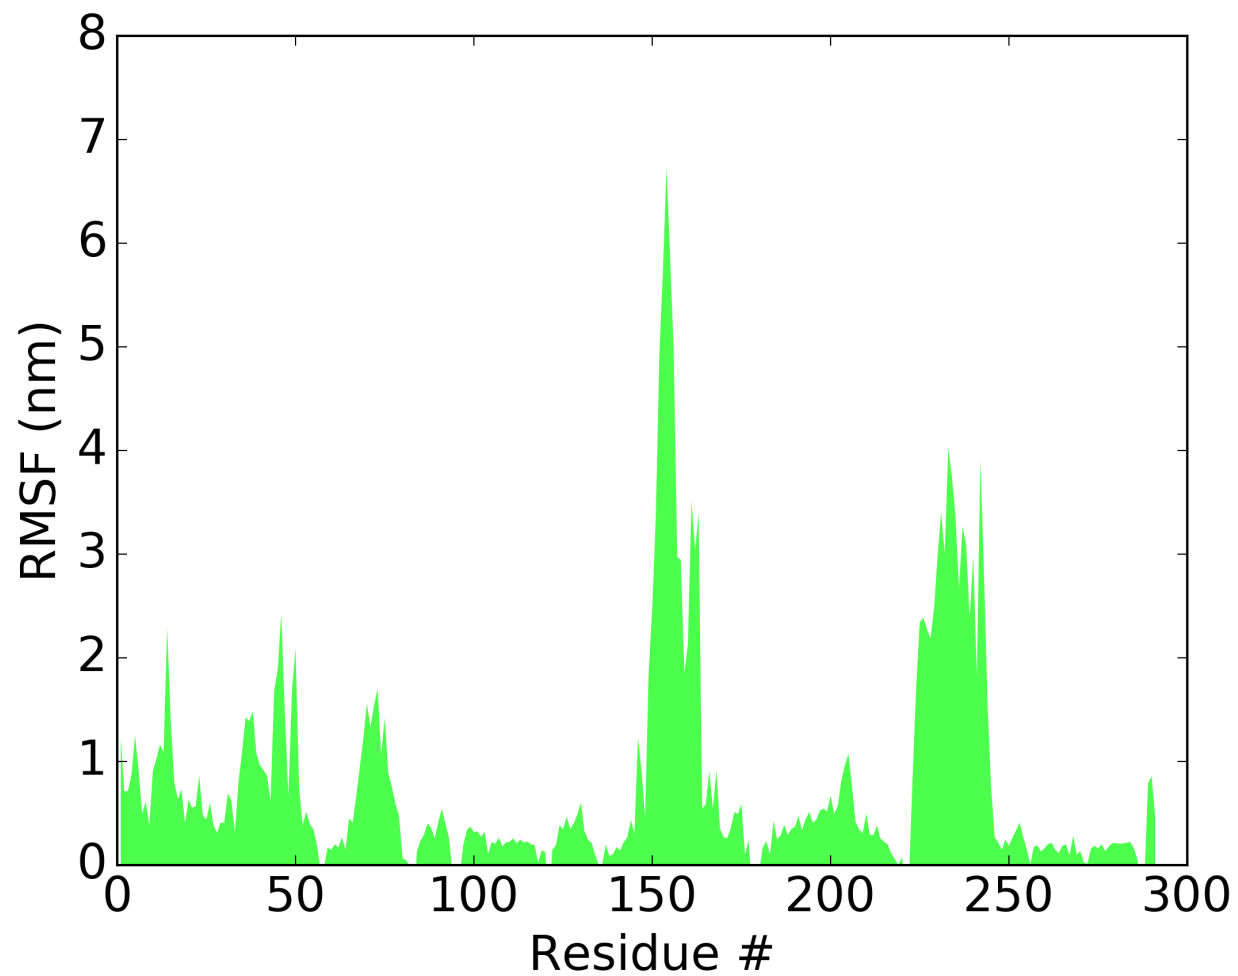

Figure S19: **Root mean square fluctuations (RMSF) of residues in CDK2.**

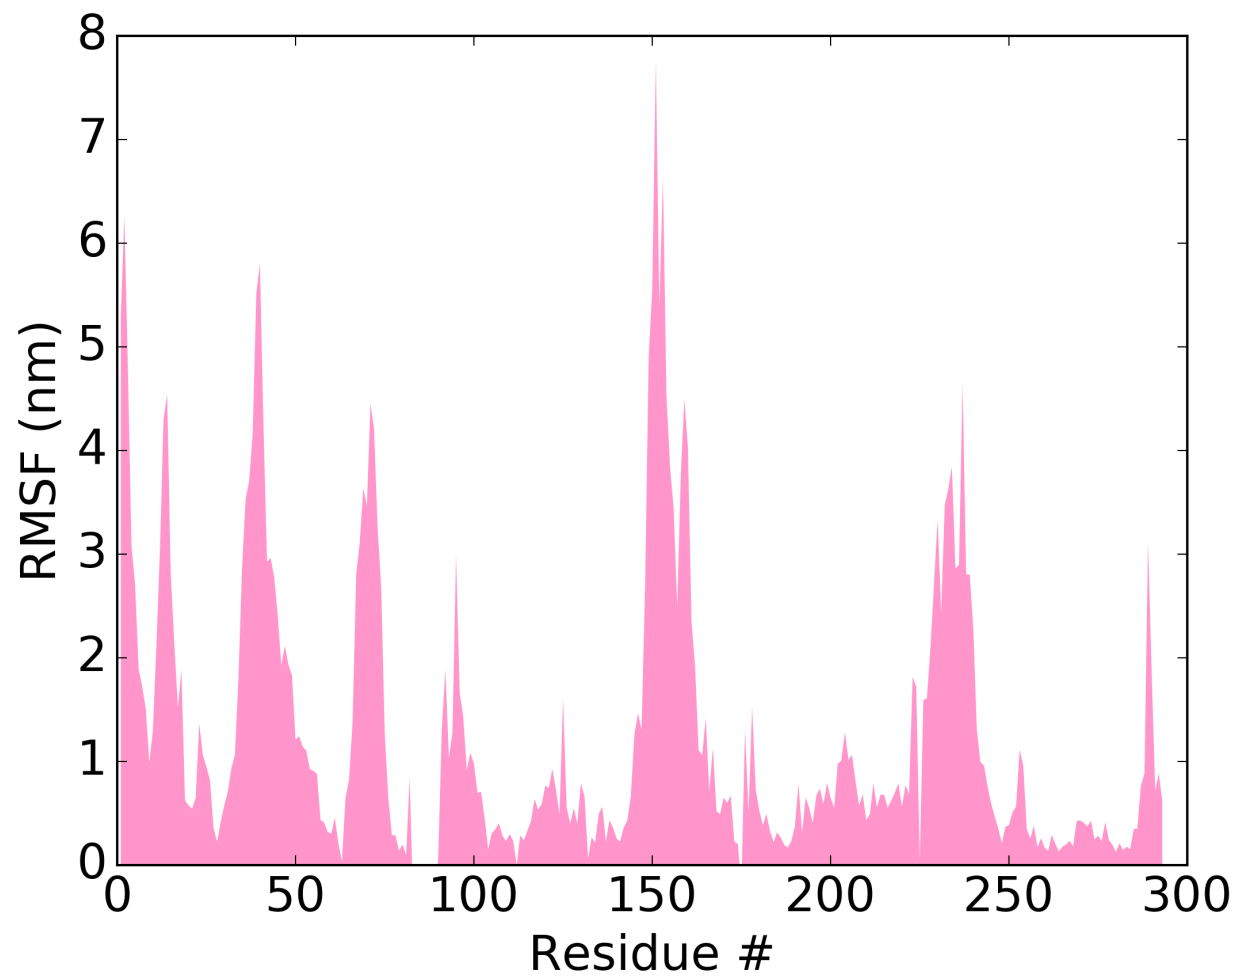

Figure S20: **Root mean square fluctuations (RMSF) of residues in CMGI.**

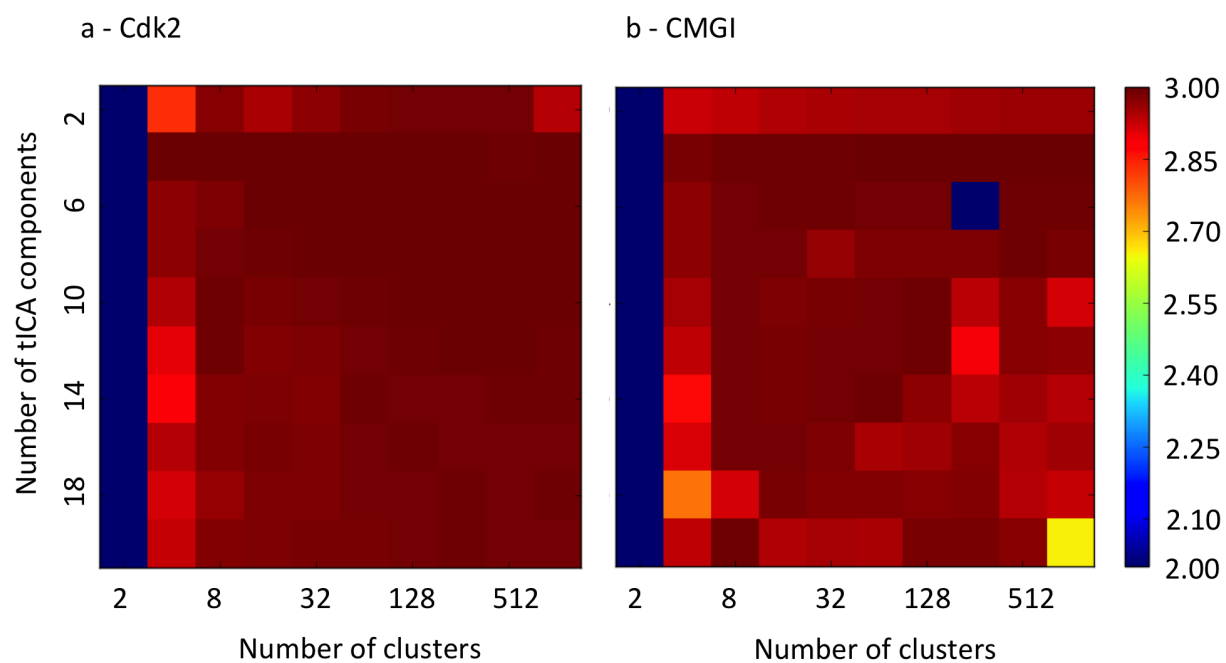

Figure S21: **GMRQ** score for MSM as a function of number of clusters and tICA components.

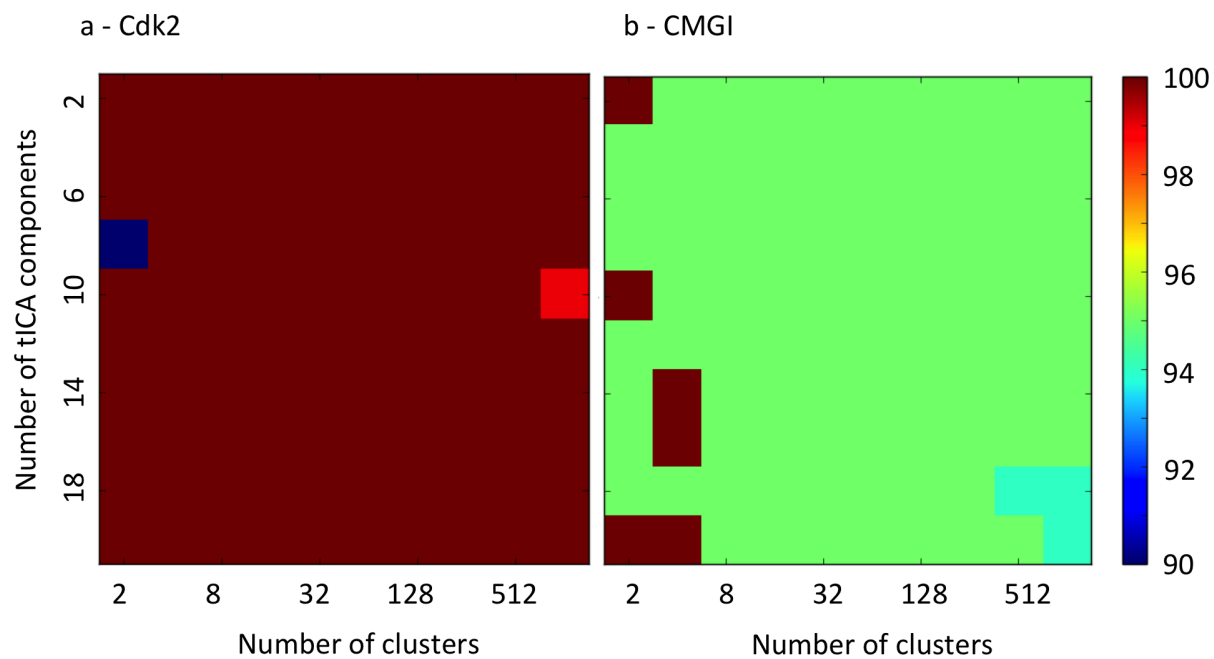

Figure S22: **Population of simulation data used in MSM as a function of number of clusters and tICA components.**

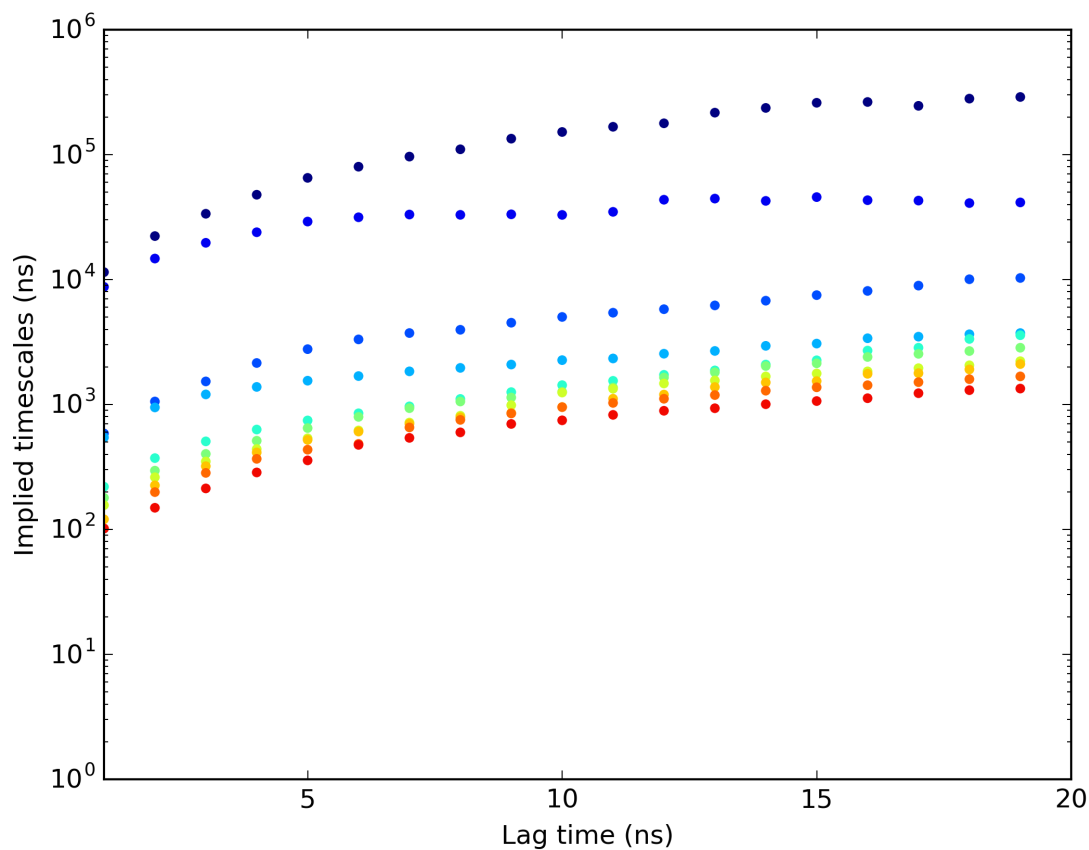

Figure S23: **CDK2's eigenvalues of the transition probability matrix.** The eigenvalues represent the timescales associated with the dynamical processes on the conformational landscape of CDK2 for the 300 state MSM. The longest timescale is in the range of 0.1-1 ms. The convergence of the eigenvalues as a function of the lag time indicates that the MSM is Markovian.

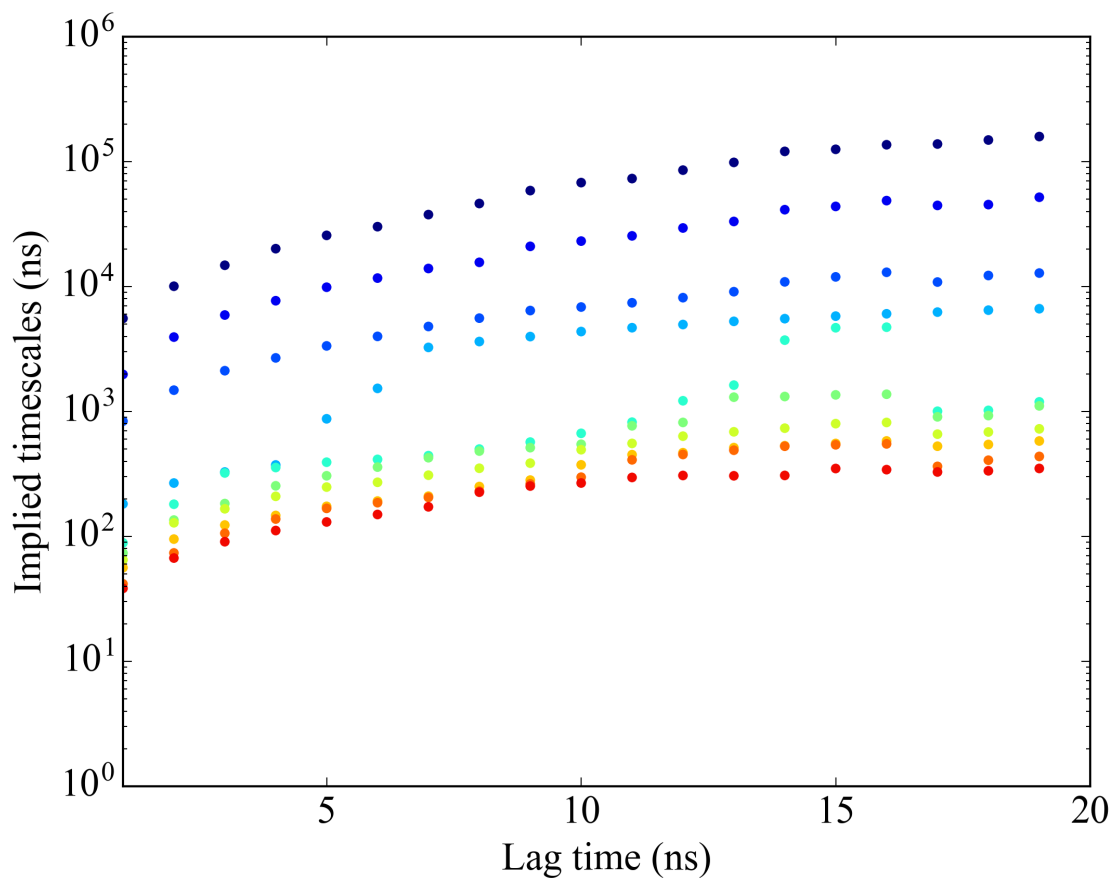

Figure S24: **CMGI's eigenvalues of the transition probability matrix.** The eigenvalues represent the timescales associated with the dynamical processes on the conformational landscape of CMGI for the 1000 state MSM. The longest timescale is in the range of 0.1-0.2 ms. The convergence of the eigenvalues as a function of the lag time indicates that the MSM is Markovian.



## References

- (1) Hamelberg, D.; Mongan, J.; McCammon, J. A. Accelerated molecular dynamics: A promising and efficient simulation method for biomolecules. *The Journal of Chemical Physics* **2004**, *120*, 11919–11929.
- (2) Robert, X.; Gouet, P. Deciphering key features in protein structures with the new END-script server. *Nucleic Acids Research* **2014**, *42*, W320–W324.
- (3) Wyatt, P. G. et al. Identification of N-(4-Piperidinyl)-4-(2, 6-dichlorobenzoylamino)-1H-pyrazole-3-carboxamide (AT7519), a Novel Cyclin Dependent Kinase Inhibitor Using Fragment-Based X-Ray Crystallography and Structure Based Drug Design†. *Journal of Medicinal Chemistry* **2008**, *51*, 4986–4999.
- (4) Jeffrey, P. D.; Russo, A. A.; Polyak, K.; Gibbs, E.; Hurwitz, J.; Massagué, J.; Pavletich, N. P. Mechanism of CDK activation revealed by the structure of a cyclinA-CDK2 complex. *Nature* **1995**, *376*, 313–320.
- (5) Betzi, S.; Alam, R.; Martin, M.; Lubbers, D. J.; Han, H.; Jakkaraj, S. R.; Georg, G. I.; Schonbrunn, E. Discovery of a Potential Allosteric Ligand Binding Site in CDK2. *ACS Chemical Biology* **2011**, *6*, 492–501.
- (6) Lawrie, A. M.; Noble, M. E.; Tunnah, P.; Brown, N. R.; Johnson, L. N.; Endicott, J. A. Protein kinase inhibition by staurosporine revealed in details of the molecular interaction with CDK2. *Nature Structural Biology* **1997**, *4*, 796–801.
